# Supplementary material
Source: PubMed Central journal article supplement (PMC6281398)
Supplement: NIHMS682016-supplement-Supplemental_text.pdf [file NIHMS682016-supplement-Supplemental_text.pdf]

## Supplemental Materials

### THE PHYLOGENETIC POSITION OF THE PARTNERS AND PATTERNS OF THE SYMBIOSIS

The phylogenetic position of the squid host (**Figure S1, upper left**) places it in an understudied group of animals, making the discovery of the molecular underpinnings of symbiosis development challenging. Specifically, the host resides in a major division of the animal kingdom, the Superphylum Lophotrochozoa, which includes mollusks, e.g., squids (cephalopods), snails, clams, and their relatives. Far fewer ‘omics’ data are available for the lophotrochozoans relative to the more widely studied Ecdysozoa, home taxon for the fruit fly and worms, and Deuterostomia, which includes the vertebrates. In fact, when it was published in 2008, the juvenile *E. scolopes* light-organ EST database (3), with a UniGene set of ~14,000, became the largest set of transcripts for any lophotrochozoan. This database has been growing exponentially, and sequencing of the *E. scolopes* genome, which is about 107% the size of the human genome, is now underway. Thus, with the appearance of these new tools, the prospect is bright for continued progress in discovering the molecular roots of symbiosis development.

Several squid species have bacterial light organs (**Figure S1, lower left**). Recent molecular phylogenetic analyses of this trait’s patterns of occurrence provide evidence that bacterial light organs arose independently in the two major squid groups in which they occur, the loliginids (arrow squids) and the sepiolids (the bobtail squids) (19). Interestingly, however, the data also suggest that within the sepiolids, which have several genera with bacterial light organs, such organs may have been lost in one genus, *Sepietta*.

The gram-negative luminous symbiont of *E. scolopes*, *V. fischeri*, is classified within the family Vibrionaceae of the Vibrionales, which are  $\gamma$ -proteobacteria, a clade that has many species forming symbioses with animals. (**Figure S1, upper right**). Most, if not all, squids in the genus *Euprymna*, which is confined to the IndoPacific, harbor only *V. fischeri* strains in their light organs (28). In contrast, the Mediterranean and Atlantic sepiolids in the genus *Sepiola* can co-harbor *V. fischeri* and *V. logei*, a close relative of *V. fischeri* (9; 46) (**Figure S1, lower right**). The genus name for these two bacterial species has been changed several times, but a recent analysis of full-genome sequence data for members of the Vibrionaceae now support placement of *V. fischeri* and *V. logei* in the genus *Vibrio* (6).

*V. fischeri* has a broad geographic range and, due to its physiological versatility (8), occurs in a variety of niches in temperate and subtropical regions. In addition to light-organ symbioses with squids and fishes, it can be found in the bacterioplankton as gut symbionts, as saprophytes, and in sediments (for review, see (27)). However, as in other *Vibrio* spp. (22; 35), a given strain is likely to have a principal niche that is relatively narrow. For example, studies of the *E. scolopes*-*V. fischeri* association demonstrate that, not only is symbiosis the defining niche of strains occurring in the squid host, but also these strains are more fit in particular partnerships. For instance, in the bacterioplankton of Hawaiian coastal seawater, the concentration of *V. fischeri* cells declines dramatically beyond a kilometer from an abundant *E. scolopes* population (18), suggesting that, while the bacterium survives well in seawater (44), its biogeography is essentially limited by the distribution of the symbiosis. Even on the island of Oahu, Hawaii, subpopulations of the squid and its symbiont show apparent co-divergence. For example, both the host and the bacterium collected from bays on the northern or southern sides of Oahu are genetically distinguishable (16; 44), and a juvenile from one side of the island is not colonized

by *V. fischeri* strains from the other side as well as those from their own habitat (44).

Interestingly, experimental serial passage through successive Hawaiian squid hosts has been reported to render a non-native strain more fit in the symbiosis, and phenotypically more like the natural symbiont (34). The genetic basis for symbiotic fitness differences between strains of *V. fischeri* is becoming clearer. In a recent benchmark study of this phenomenon, a comparative genomic approach was performed to identify squid-symbiont genes that are missing in a *V. fischeri* strain that was isolated from the light organ of a fish species, but is a poor colonizer of the *E. scolopes* light organ (21). This screen yielded one such squid symbiont-specific gene, *rscS*, which encodes a regulator of exopolysaccharide production (45) that plays an important role in initiating colonization. Introduction of an *rscS* allele into the fish symbiont rendered it capable of efficient colonization of the squid, thus identifying it as the first example of a bacterial regulatory gene responsible for a function that mediates host specificity (21).

#### THE MORPHOLOGY OF THE LIGHT ORGAN: THE EYE-LIKE FEATURES OF THE LIGHT ORGAN, AND ITS ASSOCIATION WITH THE SQUID INK SAC

Bacterial light organs are anatomically complex and, from their morphology (39), to their biochemistry (4; 24; 39), show striking similarities to image-forming eyes. Thus, they offer a compelling example of evolutionary tinkering (13), i.e., the coopting of preexisting elements for a new function. The similarities between the eye and light organ were underscored by a recent comparison of these structures through embryogenesis. The data revealed that the eye-specification genes, including the master regulatory gene *pax6*, are expressed in the light organ during development (32), which suggests that eyes and light organs form in response to the same program of gene regulation. In addition, like the eye, light organs are energetically demanding to

develop and maintain. As such, should the animal's ecology change, e.g., from nocturnal to diurnal activity, the bacterial light organ would lose its fitness value, and selection on developmental programs might drive their rapid loss. An analogous selection has been extensively studied in the evolutionary loss of eyes of the blind cavefish (14), a process that occurred over only a few million years (33) and that largely involved a change in regulation of the *pax6* gene (36). Whether a change similar genetic regulation of *pax6* by change controlled the loss of light organs in *Sepietta* spp. (**Figure S1, lower left**) remains to be determined.

Interestingly, the bacterial light organs of squids always develop in association with the ink sac, the diverticula of which provide one mechanism whereby the animal controls light emission from the organ (23; 26). In sepiolid species with light organs, the ink sac develops in a more anterior position, i.e., in those members of this family without light organs that have been examined, the ink sac is further toward the hind end of the animal (10). Light organs may also develop in association with the ink sac because of its biochemistry; proteins associated with antimicrobial function, notably nitric oxide synthase and halide peroxidase, are abundant in ink sac epithelia, and are critical for ink production (31). Significantly, the activity of these two enzymes is regulated by *V. fischeri* in the squid light organ (5; 42). While a microbial symbiosis developing in a region with strong antimicrobial activity may seem counterintuitive, it is not unusual. Approximately 11% of all insects have intracellular bacterial symbioses that are associated with the fat bodies, the major site of antimicrobial peptide production (7), and recent evidence suggests that the activity of these peptides is essential for balancing the symbiotic state in mutualistic associations (20).

## A BRIEF PERIOD WITHOUT THE SYMBIOTIC PARTNER – EMBRYOGENESIS

### PREPARES THE WAY

Although symbionts do not directly interact with embryonic tissues during the development of horizontally transmitted symbioses, embryogenesis must prepare the nascent host for its eventual interactions with microbial partners. For example, bacterial fermentation in vertebrates can occur in the foregut, caecum and hindgut (15) and, in each case, rudimentary tissues develop during the embryonic period, the form and function of which poise the tissues to establish healthy alliances with their coevolved partners (see e.g., (1; 2; 11)). In an analogous manner, embryogenesis in the squid host, as detailed below, produces a conspicuous set of tissues ready for symbiont acquisition.

The adult *E. scolopes* female lays, on average, clutches of ~150 eggs (**Figure S2a**) and will produce ~15 clutches over a 4-mo reproductive period. Maintaining an active breeding colony of 8 productive females and 8 males yields ~60,000 juveniles/yr. The embryonic period of *E. scolopes* typically occurs over 18-25 d, depending on environmental conditions (e.g., temperature and aeration level). During that time, morphological and biochemical determinants are developed that facilitate colonization by *V. fischeri* cells upon the egg's hatching (5; 17; 25; 41). Cells along the lateral surface of the developing ink sac proliferate to produce populations that give rise to the features of the hatchling light organ (**Figure S2b**). The nascent crypts form as invaginations in these regions (**Figure S2c**). The three crypts on each side of the organ, which we designate crypts 1, 2, and 3, form sequentially, beginning with the crypt 1 about half way through embryogenesis; the invagination to form crypt 3, which is last to develop, begins only a few days before hatching. This sequence of development results in variation in the crypts' relative maturity at the time of hatching. Outgrowths of the lateral

surfaces of the embryonic rudiment form concomitantly with the crypts (**Figure 2Sd**), ultimately producing the juvenile-specific epithelial fields that function to harvest symbionts from the bacterioplankton. Both the surface epithelium and the immature crypts are densely ciliated. In the newly hatched juvenile the deep portions of crypts 1 and 2 have lost the cilia along their epithelial surfaces and matured to the microvillous condition that persists throughout the life of the animal. On occasion, the apical surfaces of crypt 3 epithelia are still ciliated at hatching, which is likely why this crypt often responds differently to interactions with *V. fischeri* cells (38). Although the biochemical adaptations of the hatchling crypt environment that will mediate a successful colonization have not been well characterized, the superficial ciliated fields involved in harvesting the symbiont have received considerable attention. In addition to being readied for mucus secretion (29; 30), which occurs shortly after hatching, embryogenesis also provides the hatchling's ciliated field with abundant stores of antimicrobial compounds, including nitric oxide synthase (5) and a peptidoglycan recognition protein (PGRP) (40).

### **Supplementary figure legends**

**Figure S1.** Cladograms illustrating the relationships of the host (12; 37) and the symbiont (6; 43) within their respective domains. \*, clades with symbiotic systems where well-developed host genetics are available; †, examples of the clades of host and symbiont with members that develop light organ symbioses; such associations are thought to have evolved independently in the squids several times (19). *V. fischeri* image (lower right) provided by Dennis Kunkel Microscopy, Inc.

**Figure S2.** Embryogenesis, the developmental period that occurs in the absence of the symbiont. (a) An adult female surveying a clutch of ~200 eggs, which she has laid on hard substrate provided in the culture system. (b) A ventral view of an embryo removed from the egg capsule.

This image of an individual about half way through embryogenesis shows the light organ (white square) developing as a rudiment associated with the ink sac. (c, d) Light organ about two-thirds of the way through embryogenesis. (c) A surface view reveals the developing anterior appendage, and early invaginations at the pores. (d) A deeper view shows a duct, medial to one of the pores.

#### SUPPLEMENTARY LITERATURE CITED

1. Bry L, Falk PG, Midtvedt T, Gordon JI. 1996. A model of host-microbial interactions in an open mammalian ecosystem. *Science* 273:1380-3
2. Cherrier M, Ohnmacht C, Cording S, Eberl G. 2012. Development and function of intestinal innate lymphoid cells. *Curr Opin Immunol* 24:277-83
3. Chun CK, Troll JV, Koroleva I, Brown B, Manzella L, et al. 2008. Effects of colonization, luminescence, and autoinducer on host transcription during development of the squid-vibrio association. *Proc Natl Acad Sci U S A* 105:11323-8
4. Crookes WJ, Ding LL, Huang QL, Kimbell JR, Horwitz J, McFall-Ngai MJ. 2004. Reflectins: the unusual proteins of squid reflective tissues. *Science* 303:235-8
5. Davidson SK, Koropatnick TA, Kossmehl R, Sycuro L, McFall-Ngai MJ. 2004. NO means 'yes' in the squid-vibrio symbiosis: nitric oxide (NO) during the initial stages of a beneficial association. *Cell Microbiol* 6:1139-51
6. Dikow RB, Smith WL. 2013. Genome-level homology and phylogeny of Vibrionaceae (Gammaproteobacteria: Vibrionales) with three new complete genome sequences. *BMC microbiology* 13:80

7. Douglas AE. 1989. Mycetocyte symbiosis in insects. *Biological reviews of the Cambridge Philosophical Society* 64:409-34
8. Dunn AK. 2012. *Vibrio fischeri* metabolism: symbiosis and beyond. *Adv Microb Physiol* 61:37-68
9. Fidopiastis PM, von Boletzky S, Ruby EG. 1998. A new niche for *Vibrio logei*, the predominant light organ symbiont of squids in the genus *Sepiola*. *J Bacteriol* 180:59-64
10. Foster J, McFall-Ngai MJ. 2002. Comparison of the light organ development of *Sepiola robusta* Naef and *Euprymna scolopes* Berry (Cephalopoda: Sepiolidae). *Bull Mar Sci* 70:141-53
11. Franco AJ, Masot AJ, Aguado MC, Gomez L, Redondo E. 2004. Morphometric and immunohistochemical study of the rumen of red deer during prenatal development. *Journal of anatomy* 204:501-13
12. Giribet G. 2008. Assembling the lophotrochozoan (=spiralian) tree of life. *Philosophical transactions of the Royal Society of London. Series B, Biological sciences* 363:1513-22
13. Jacob F. 1977. Evolution and tinkering. *Science* 196:1161-6
14. Jeffery WR. 2009. Evolution and development in the cavefish *Astyanax*. *Curr Top Dev Biol* 86:191-221
15. Karasov WH, Carey HV. 2009. Metabolic teamwork between gut microbes and hosts. *Microbe* 4:323-8
16. Kimbell JL, McFall-Ngai MJ, Roderick GK. 2002. Two genetically distinct populations of bobtail squid, *Euprymna scolopes*, exist on the island of Oahu. *Pac Sci* 56:347-55



17. Kremer N, Philipp EE, Carpentier MC, Brennan CA, Kraemer L, et al. 2013. Initial symbiont contact orchestrates host-organ-wide transcriptional changes that prime tissue colonization. *Cell Host Microbe* 14:183-94
18. Lee KH, Ruby EG. 1992. Detection of the light organ symbiont, *Vibrio fischeri*, in Hawaiian seawater by using *lux* gene probes. *Appl Environ Microbiol* 58:942-7
19. Lindgren AR, Pankey MS, Hochberg FG, Oakley TH. 2012. A multi-gene phylogeny of Cephalopoda supports convergent morphological evolution in association with multiple habitat shifts in the marine environment. *BMC Evol Biol* 12:129
20. Login FH, Balmand S, Vallier A, Vincent-Monegat C, Vigneron A, et al. 2011. Antimicrobial peptides keep insect endosymbionts under control. *Science* 334:362-5
21. Mandel MJ, Wollenberg MS, Stabb EV, Visick KL, Ruby EG. 2009. A single regulatory gene is sufficient to alter bacterial host range. *Nature* 458:215-8
22. Materna AC, Friedman J, Bauer C, David C, Chen S, et al. 2012. Shape and evolution of the fundamental niche in marine *Vibrio*. *Isme J* 6:2168-77
23. McFall-Ngai M, Montgomery MK. 1990. The anatomy and morphology of the sdukt bacterial light organ of *Euprymna scolopes* (Cephalopoda: Sepiolidae). *Biol Bull* 179:332-9
24. Montgomery MK, McFall-Ngai MJ. 1992. The muscle-derived lens of a squid bioluminescent organ is biochemically convergent with the ocular lens. Evidence for recruitment of aldehyde dehydrogenase as a predominant structural protein. *J Biol Chem* 267:20999-1003
25. Montgomery MK, McFall-Ngai MJ. 1993. Embryonic development of the light organ of the sepiolid squid *Euprymna scolopes* Berry. *Biol Bull* 184:296-308

26. Montgomery MK, McFall-Ngai MJ. 1998. Late postembryonic development of the symbiotic light organ of *Euprymna scolopes* (Cephalopoda: Sepiolidae). *Biol Bull* 195:326-36
27. Nealson KH, Hastings JW. 1979. Bacterial bioluminescence: its control and ecological significance. *Microbiological reviews* 43:496-518
28. Nishiguchi MK, Ruby EG, McFall-Ngai MJ. 1998. Competitive dominance among strains of luminous bacteria provides an unusual form of evidence for parallel evolution in Sepiolid squid-vibrio symbioses. *Appl Environ Microbiol* 64:3209-13
29. Nyholm SV, Deplancke B, Gaskins HR, Apicella MA, McFall-Ngai MJ. 2002. Roles of *Vibrio fischeri* and nonsymbiotic bacteria in the dynamics of mucus secretion during symbiont colonization of the *Euprymna scolopes* light organ. *Appl Environ Microbiol* 68:5113-22
30. Nyholm SV, Stabb EV, Ruby EG, McFall-Ngai MJ. 2000. Establishment of an animal-bacterial association: recruiting symbiotic vibrios from the environment. *Proc Natl Acad Sci U S A* 97:10231-5
31. Palumbo A. 2003. Melanogenesis in the ink gland of *Sepia officinalis*. *Pigment cell research / sponsored by the European Society for Pigment Cell Research and the International Pigment Cell Society* 16:517-22
32. Peyer SM, Pankey MS, Oakley TH, McFall-Ngai MJ. 2013. Eye-specification genes in the bacterial light organ of the bobtail squid *Euprymna scolopes*, and their expression in response to symbiont cues. *Mechanisms of development*

33. Porter ML, Dittmar K, Perez-Losada M. 2007. How long does evolution of the troglomorphic form take? Estimating divergence times in *Astyanax mexicanus*. *Acta Carsologica* 36:173-82
34. Schuster BM, Perry LA, Cooper VS, Whistler CA. 2010. Breaking the language barrier: experimental evolution of non-native *Vibrio fischeri* in squid tailors luminescence to the host. *Symbiosis* 51:85-96
35. Shapiro BJ, Friedman J, Cordero OX, Preheim SP, Timberlake SC, et al. 2012. Population genomics of early events in the ecological differentiation of bacteria. *Science* 336:48-51
36. Strickler AG, Yamamoto Y, Jeffery WR. 2001. Early and late changes in Pax6 expression accompany eye degeneration during cavefish development. *Dev Genes Evol* 211:138-44
37. Strugnell J, Nishiguchi MJ. 2007. Molecular phylogeny of coleoid cephalopods (Mollusca: Cephalopoda) inferred from three mitochondrial and six nuclear loci: a comparison of alignment, implied alignment and analysis methods. *J Molluscan Stud* 73:399-410
38. Sycuro LK, Ruby EG, McFall-Ngai M. 2006. Confocal microscopy of the light organ crypts in juvenile *Euprymna scolopes* reveals their morphological complexity and dynamic function in symbiosis. *J Morphol* 267:555-68
39. Tong D, Rozas NS, Oakley TH, Mitchell J, Colley NJ, McFall-Ngai MJ. 2009. Evidence for light perception in a bioluminescent organ. *Proc Natl Acad Sci U S A* 106:9836-41

40. Troll JV, Adin DM, Wier AM, Paquette N, Silverman N, et al. 2009. Peptidoglycan induces loss of a nuclear peptidoglycan recognition protein during host tissue development in a beneficial animal-bacterial symbiosis. *Cell Microbiol* 11:1114-27
41. Troll JV, Bent EH, Paquette N, Wier AM, Goldman WE, et al. 2010. Taming the symbiont for coexistence: a host PGRP neutralizes a bacterial symbiont toxin. *Environ Microbiol*
42. Weis VM, Small AL, McFall-Ngai MJ. 1996. A peroxidase related to the mammalian antimicrobial protein myeloperoxidase in the *Euprymna-Vibrio* mutualism. *Proc Natl Acad Sci U S A* 93:13683-8
43. Williams KP, Gillespie JJ, Sobral BW, Nordberg EK, Snyder EE, et al. 2010. Phylogeny of gammaproteobacteria. *J Bacteriol* 192:2305-14
44. Wollenberg MS, Ruby EG. 2011. Phylogeny and fitness of *Vibrio fischeri* from the light organs of *Euprymna scolopes* in two Oahu, Hawaii populations. *Isme J*
45. Yip ES, Geszvain K, DeLoney-Marino CR, Visick KL. 2006. The symbiosis regulator *rscS* controls the *syp* gene locus, biofilm formation and symbiotic aggregation by *Vibrio fischeri*. *Mol Microbiol* 62:1586-600
46. Zamborsky DJ, Nishiguchi MK. 2011. Phylogeographical patterns among Mediterranean sepiolid squids and their *Vibrio* symbionts: environment drives specificity among sympatric species. *Appl Environ Microbiol* 77:642-9

Figure S1

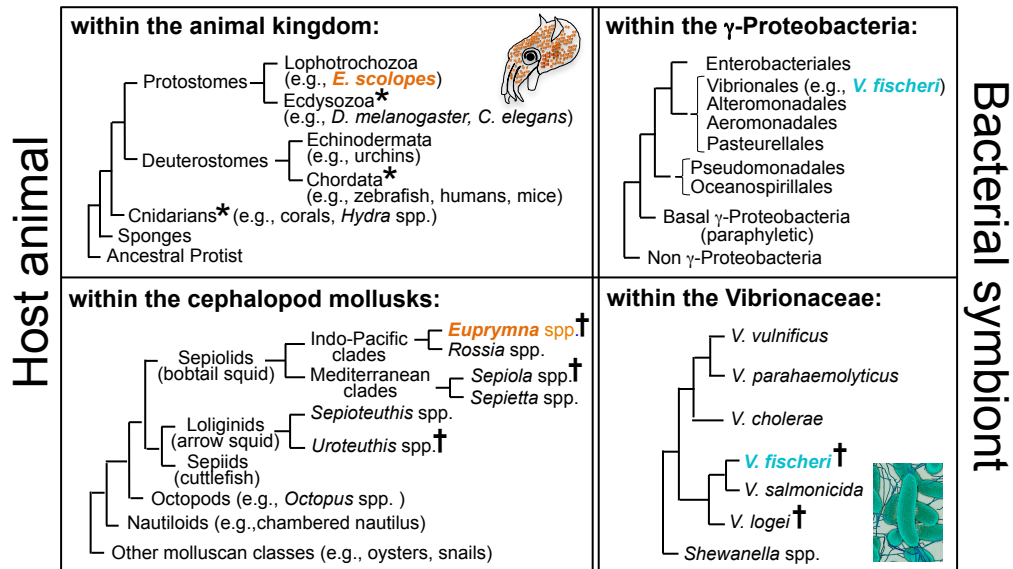

**Figure S1**

Cladograms illustrating the relationships of the host (33; 108) and the symbiont (19; 121) within their respective domains. \*, clades with symbiotic systems where well-developed host genetics are available; †, examples of the clades of host and symbiont with members that develop light organ symbioses; such associations are thought to have evolved independently in the squids several times (60). *V. fischeri* image (lower right) provided by Dennis Kunkel Microscopy, Inc.

## Figure S2

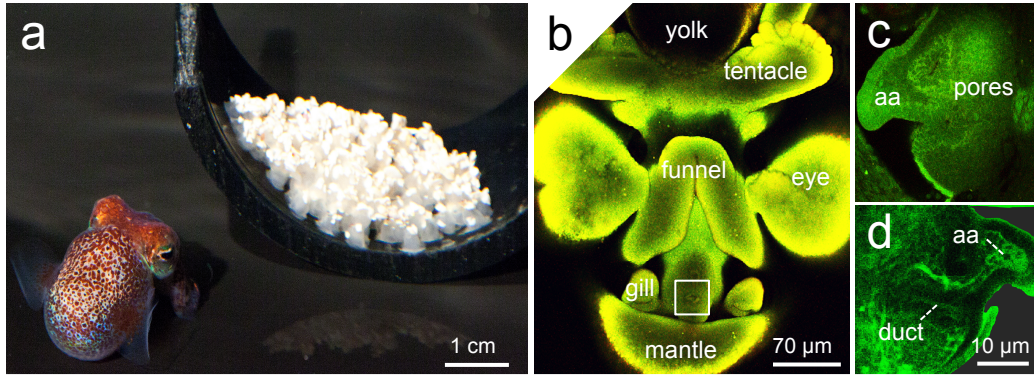

### Figure S2

Embryogenesis, the developmental period that occurs in the absence of the symbiont. (a) An adult female surveying a clutch of ~200 eggs, which she has laid on hard substrate provided in the culture system. (b) A ventral view of an embryo removed from the egg capsule. This image of an individual about half way through embryogenesis shows the light organ (white square) developing as a rudiment associated with the ink sac. (c, d) Light organ about two-thirds of the way through embryogenesis. (c) A surface view reveals the developing anterior appendage, and early invaginations at the pores. (d) A deeper view shows a duct, medial to one of the pores.
